# Supplementary material for: Photosensitized oxidation of alkenes with dendrimers as microreactors: controllable selectivity between energy and electron transfer pathway
Source: Royal Society of Chemistry journal article supplement (doi:10.1039/b9nj00786e), 2010-01-01
Supplement: b9nj00786e.pdf [file b9nj00786e.pdf]

## Supplementary Data

# Photosensitized Oxidation of Alkenes with Dendrimers as Microreactors: Controllable Selectivity between Energy and Electron Transfer Pathway

Zhao Yuan, Shaojun Zheng, Yi Zeng, Yongbin Han,\* Jinping Chen, Yingying Li  
and Yi Li\*

*Key Laboratory of Photochemical Conversion and Optoelectronic Materials,  
Technical Institute of Physics and Chemistry, Chinese Academy of Sciences, Beijing  
100190, P. R. China.*

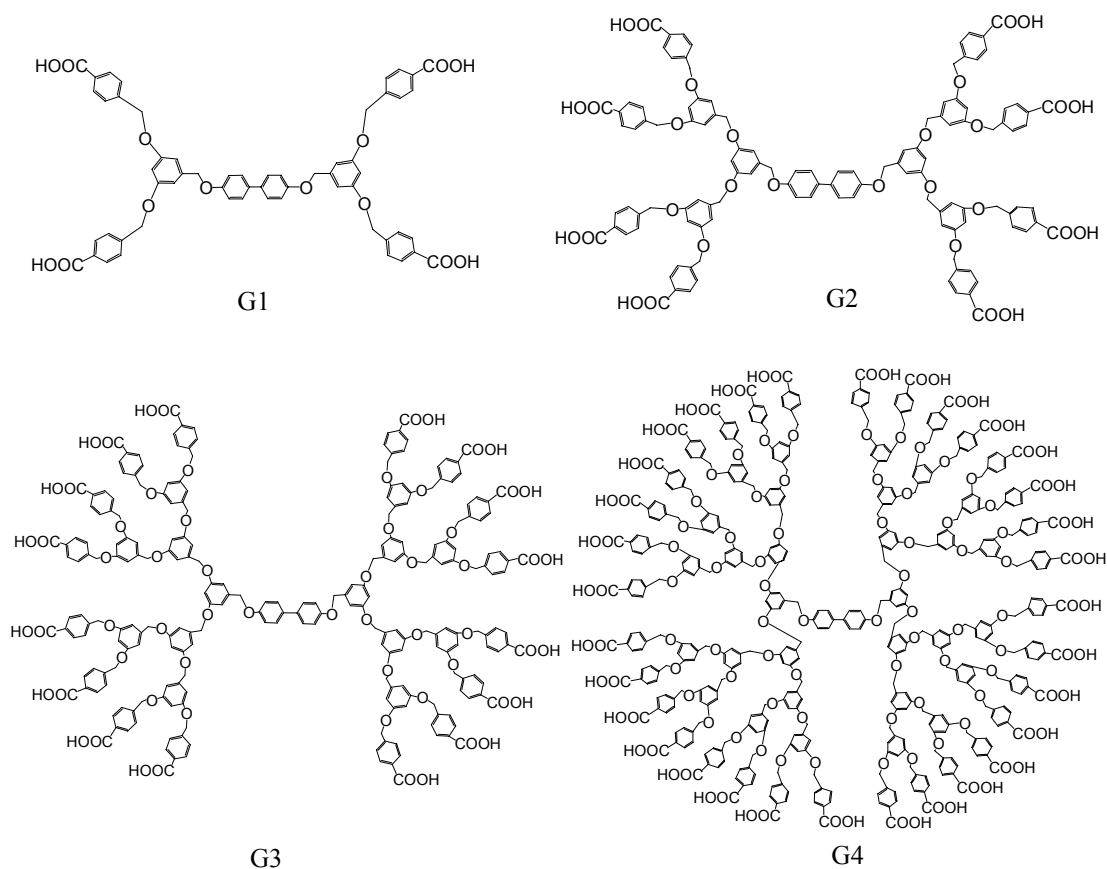

**Figure S1.** Structures of the dendrimers generation 1-4

**$^1\text{H}$  NMR spectra of the methyl ester protected dendrimers:**

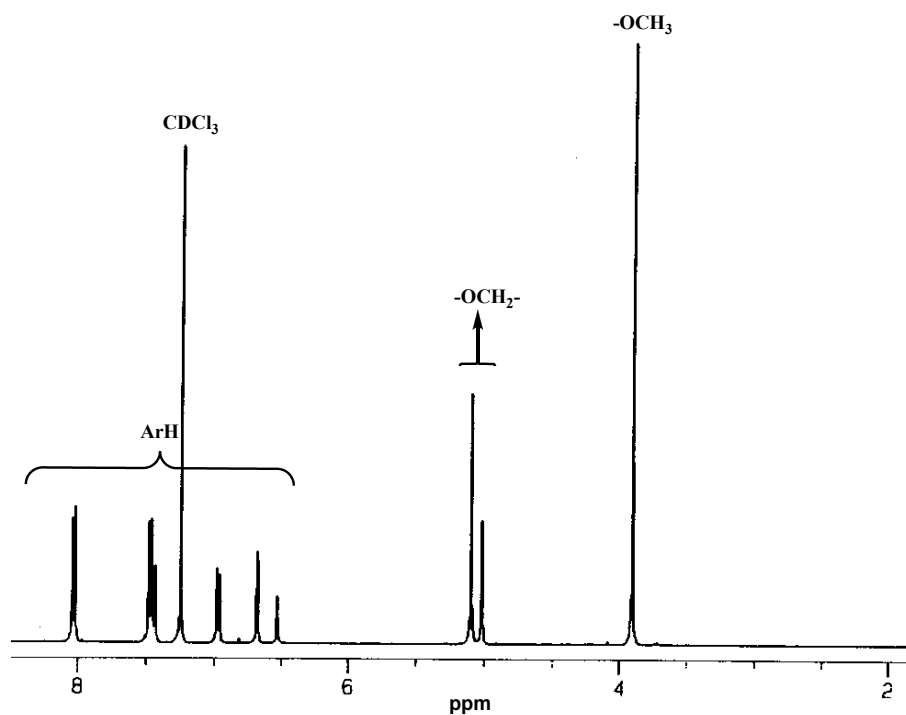

Figure S2.  $^1\text{H}$  NMR spectrum (400MHz,  $\text{CDCl}_3$ ) of  $(\text{CH}_3\text{OOC})_4\text{-G1-C}$  dendrimer.

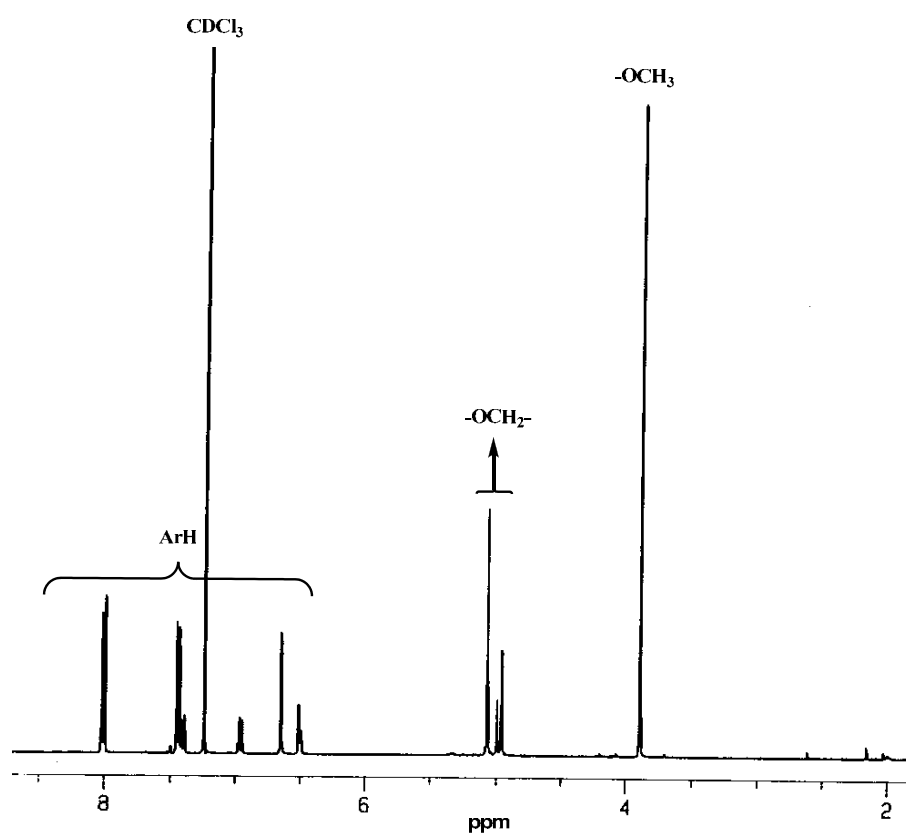

Figure S3.  $^1\text{H}$  NMR spectrum (400MHz,  $\text{CDCl}_3$ ) of  $(\text{CH}_3\text{OOC})_8\text{-G2-C}$  dendrimer.

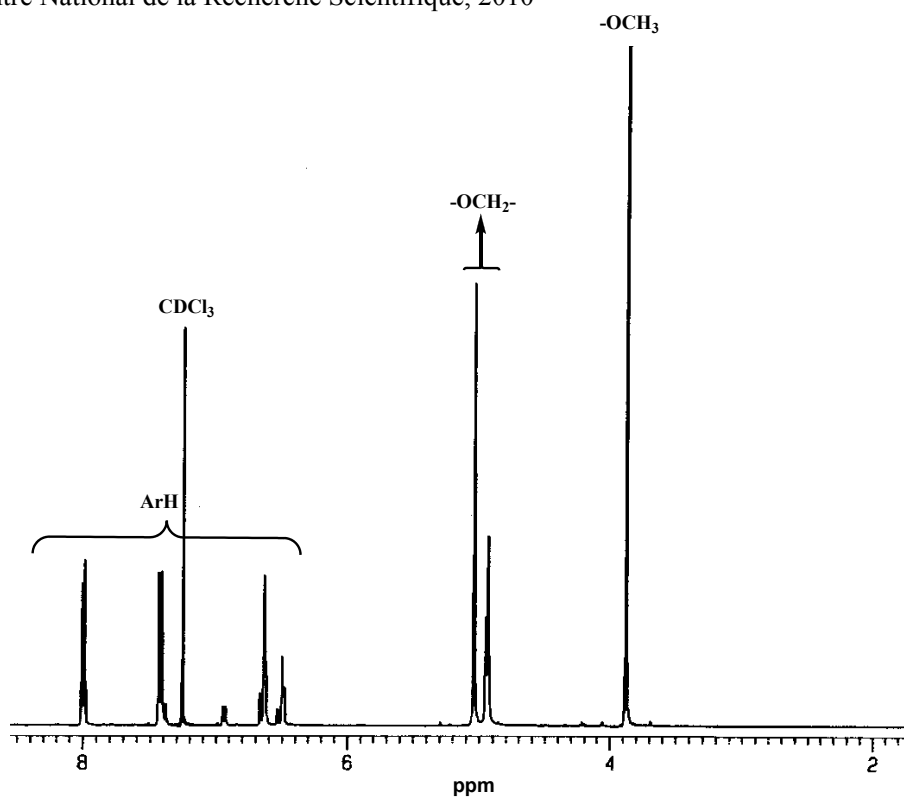

**Figure S4.** <sup>1</sup>H NMR spectrum (400MHz, CDCl<sub>3</sub>) of (CH<sub>3</sub>OOC)<sub>16</sub>-G3-C dendrimer.

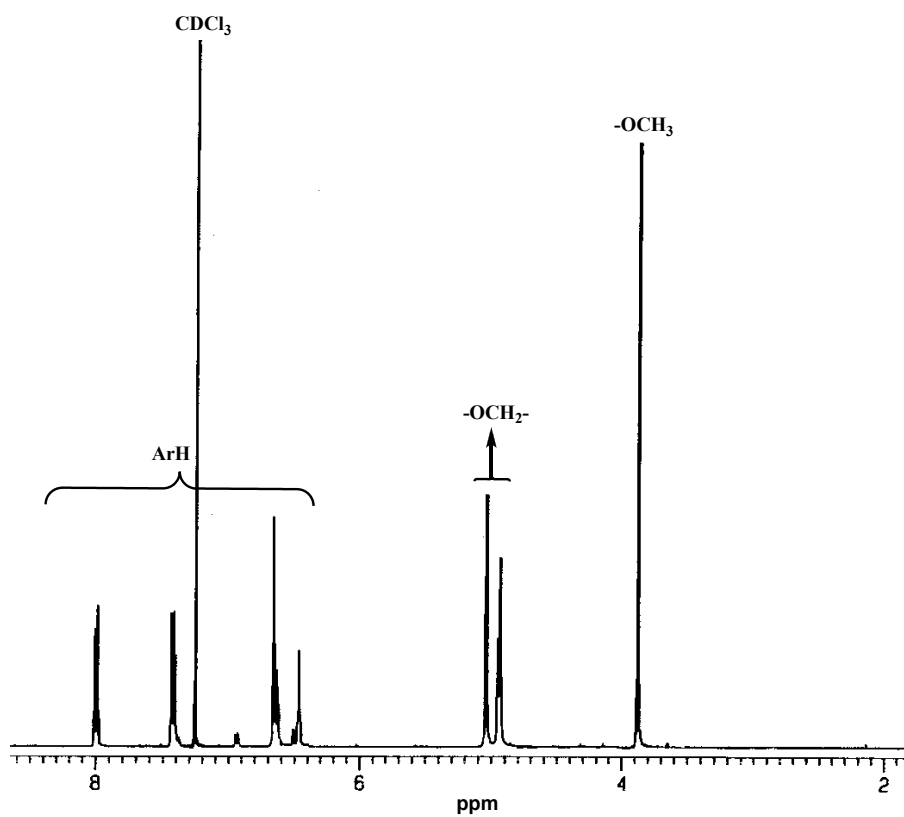

**Figure S5.** <sup>1</sup>H NMR spectrum (400MHz, CDCl<sub>3</sub>) of (CH<sub>3</sub>OOC)<sub>32</sub>-G4-C dendrimer.
